# Supplementary material
Source: MDPI journal article supplement (https://www.mdpi.com/2311-7524/5/2/41)
Supplement: s1 [file s1]

---

Alsanius, B. W.; Karlsson, M.; Rosberg, A.-K.; Dorais, M.; Naznin, T.; Khalil, S.; Bergstrand, K.-J. (2018). Light and microbial lifestyle: the impact of light quality on plant-microbe interactions in horticultural production systems: a review. *Horticulturae*.

## **Appendix A**

### **Supplementary material**

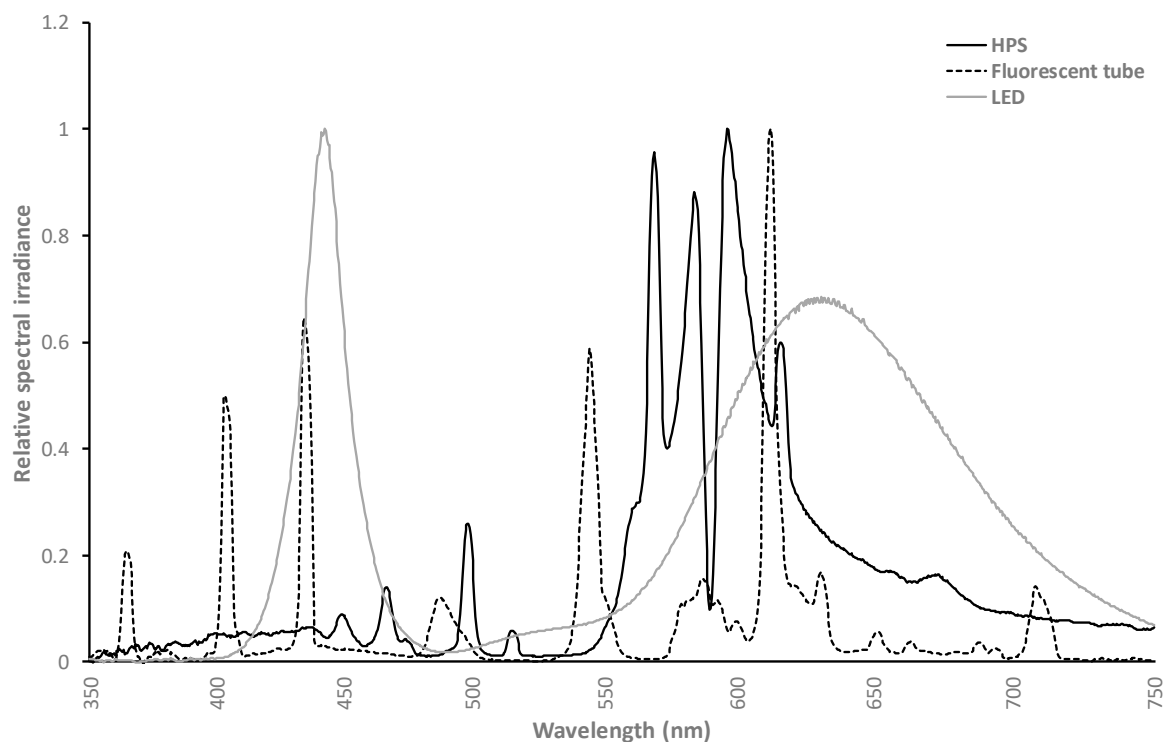

**Figure S1:** Relative spectral output from three different light sources: HPS lamps (Philips Master 400 W), fluorescent tubes (Sylvania TLD840 58W), and LED lights (Valoya B150, spectrum AP673L 144W).

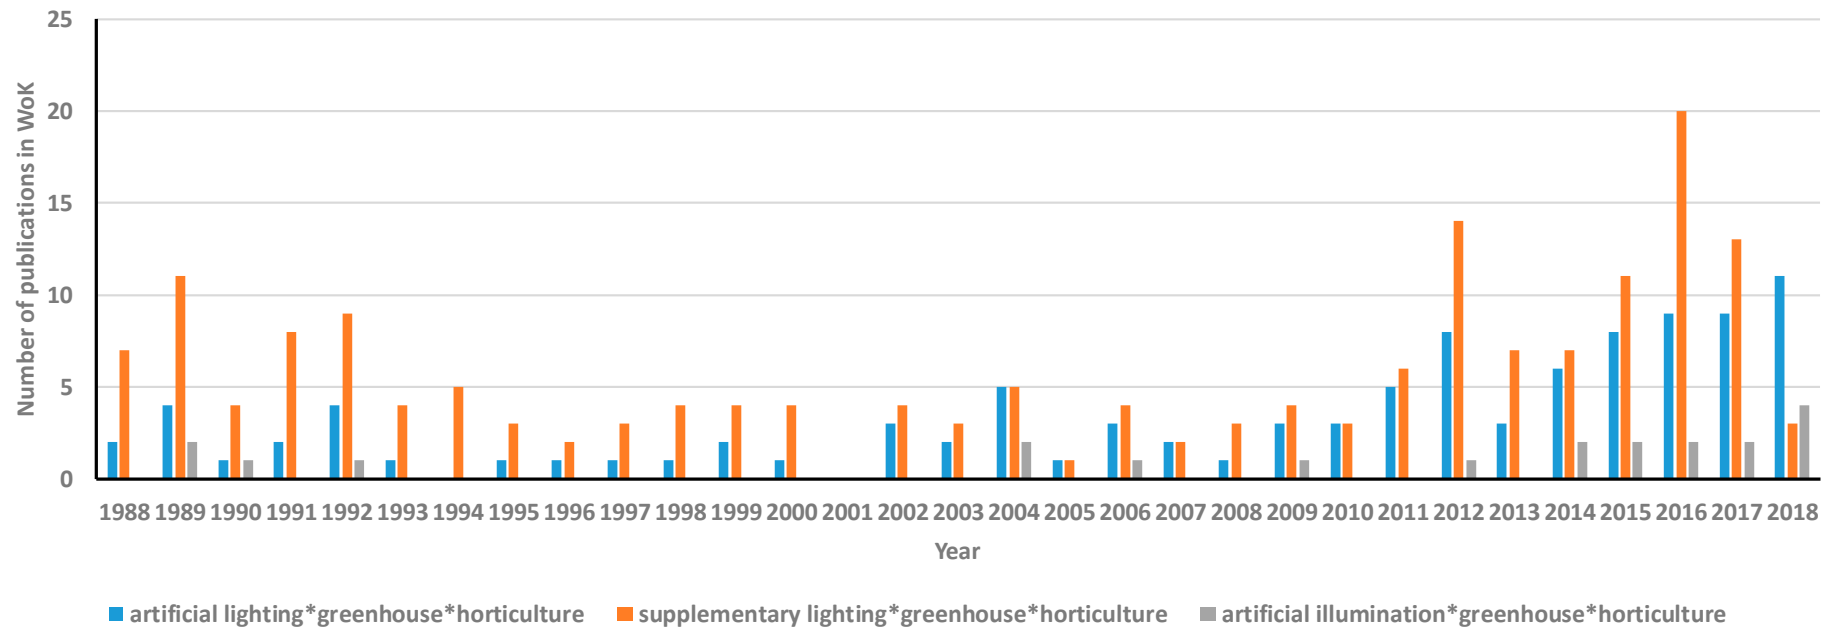

**Figure S2:** Number of publications considering the topic supplementary lighting in greenhouse horticulture. The literature search considered three keyword combinations, namely artificial lighting\*greenhouse\*horticulture (102 publications), supplementary lighting\*greenhouse\*horticulture (201 publications) and artificial illumination\*greenhouse\*horticulture (21 publications) and was performed in Web of Knowledge (WoK) using all WoK databases (Web of Science Core Collection, Biosis Citation Index, CABI, Current Contents Connect, Data Citation Index, Derwent Innovation Index, KCI-Korean Journal Database, MEDLINE, Russian Science Citation Index, SciELO Citation Index, Zoological Record). The literature search was restricted to 30 years (1988-2018).

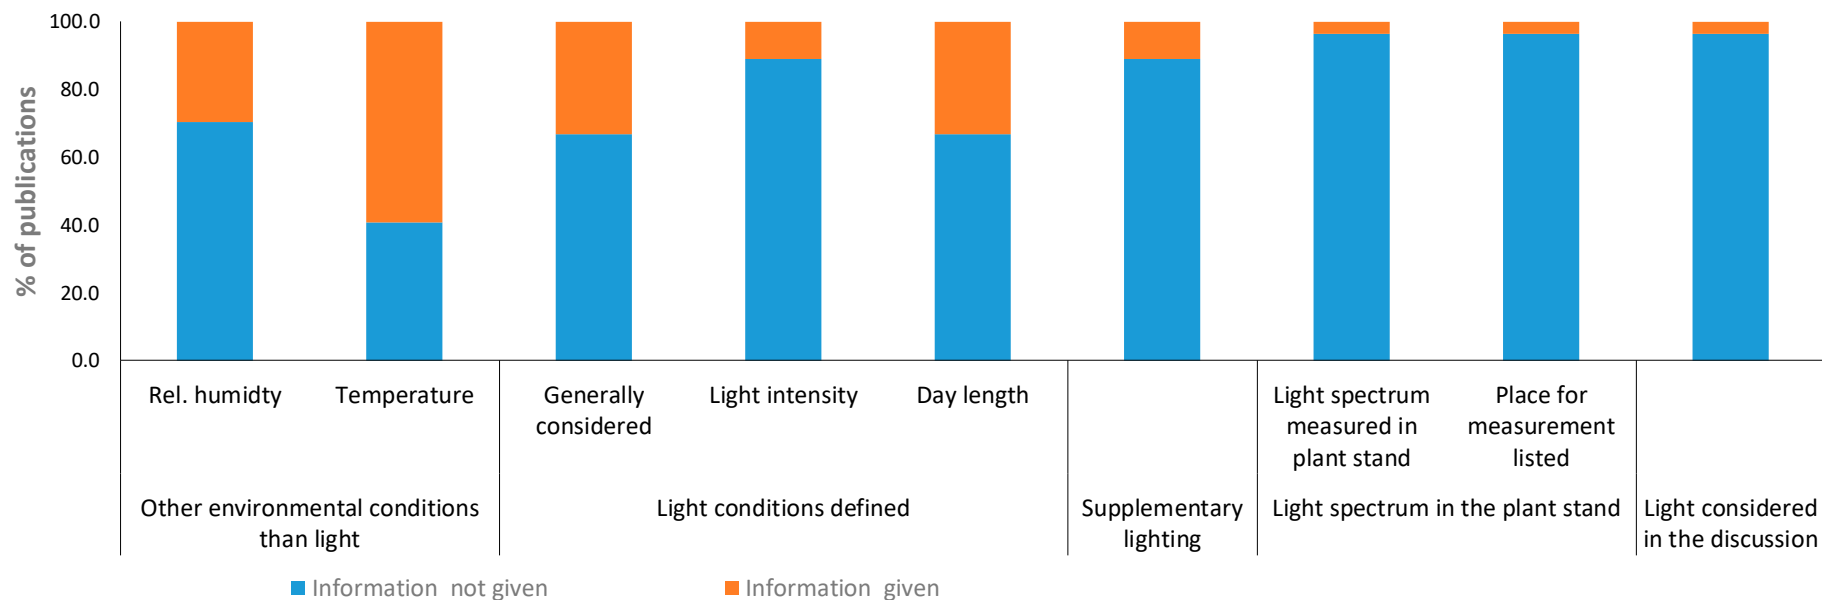

**Figure S3:** Description of light conditions in study output considering the keyword combination “phyllosphere\*greenhouse\*horticulture”. The search was restricted to 30 years (1988-2018) and entailed 27 publications conducted under greenhouse, climate chamber, or polytunnel. The survey was performed in Web of Knowledge (WoK) using all WoK databases (Web of Science Core Collection, Biosis Citation Index, CABI, Current Contents Connect, Data Citation Index, Derwent Innovation Index, KCI-Korean Journal Database, MEDLINE, Russian Science Citation Index, SciELO Citation Index, Zoological Record). Values indicate percentage of studies stating or avoiding information on environmental conditions (relative humidity, temperature), light conditions (day length, light intensity) and use of supplementary lighting, as well as control of description of light spectrum in the plant stand. The proportion of publications discussing the impact of light on the results obtained was also determined (3.9% corresponds to one publication).
